# Supplementary material
Source: publisher figshare collection journal article supplement (https://acs.figshare.com/ndownloader/files/3771814)
Supplement: Supplementary file 1 [file 3771814]

# Xylanase Immobilized on Novel Multifunctional Hyperbranched Polyglycerol-Grafted Magnetic Nanoparticles: An Efficient and Robust Biocatalyst

*Amir Landarani-Isfahani,<sup>†\*</sup> Asghar Taheri-Kafrani,<sup>‡\*</sup> Mina Amini,<sup>†</sup> Valiollah Mirkhani,<sup>†</sup> Majid Moghadam,<sup>†</sup> Asieh Soozanipour,<sup>‡</sup> and Amir Razmjou<sup>‡</sup>*

<sup>†</sup> Catalysis Division, Department of Chemistry, University of Isfahan, Isfahan 81746-73441, Iran

<sup>‡</sup> Department of Biotechnology, Faculty of Advanced Sciences and Technologies, University of Isfahan, Isfahan 81746-73441, Iran

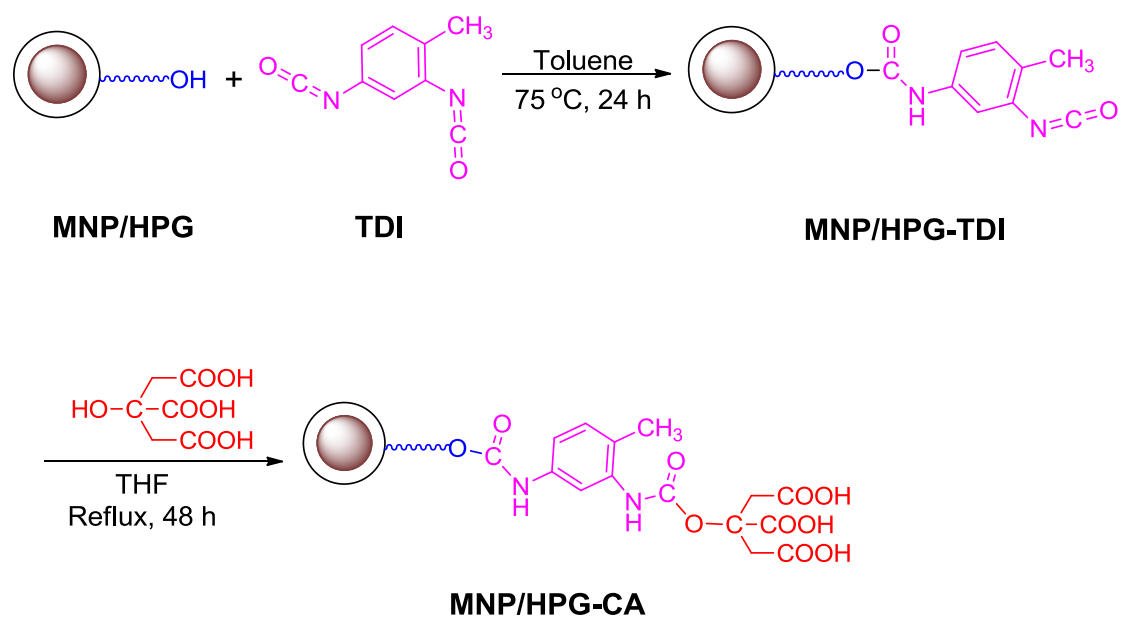

**Scheme S1.** Synthesis of MNP/HPG-TDI and MNP/HPG-CA.

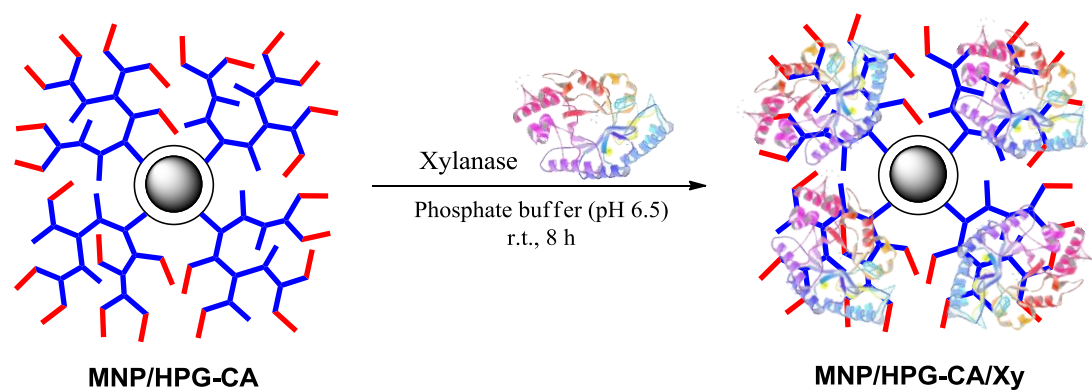

**Scheme S2.** Immobilization of xylanase onto MNP/HPG-CA.

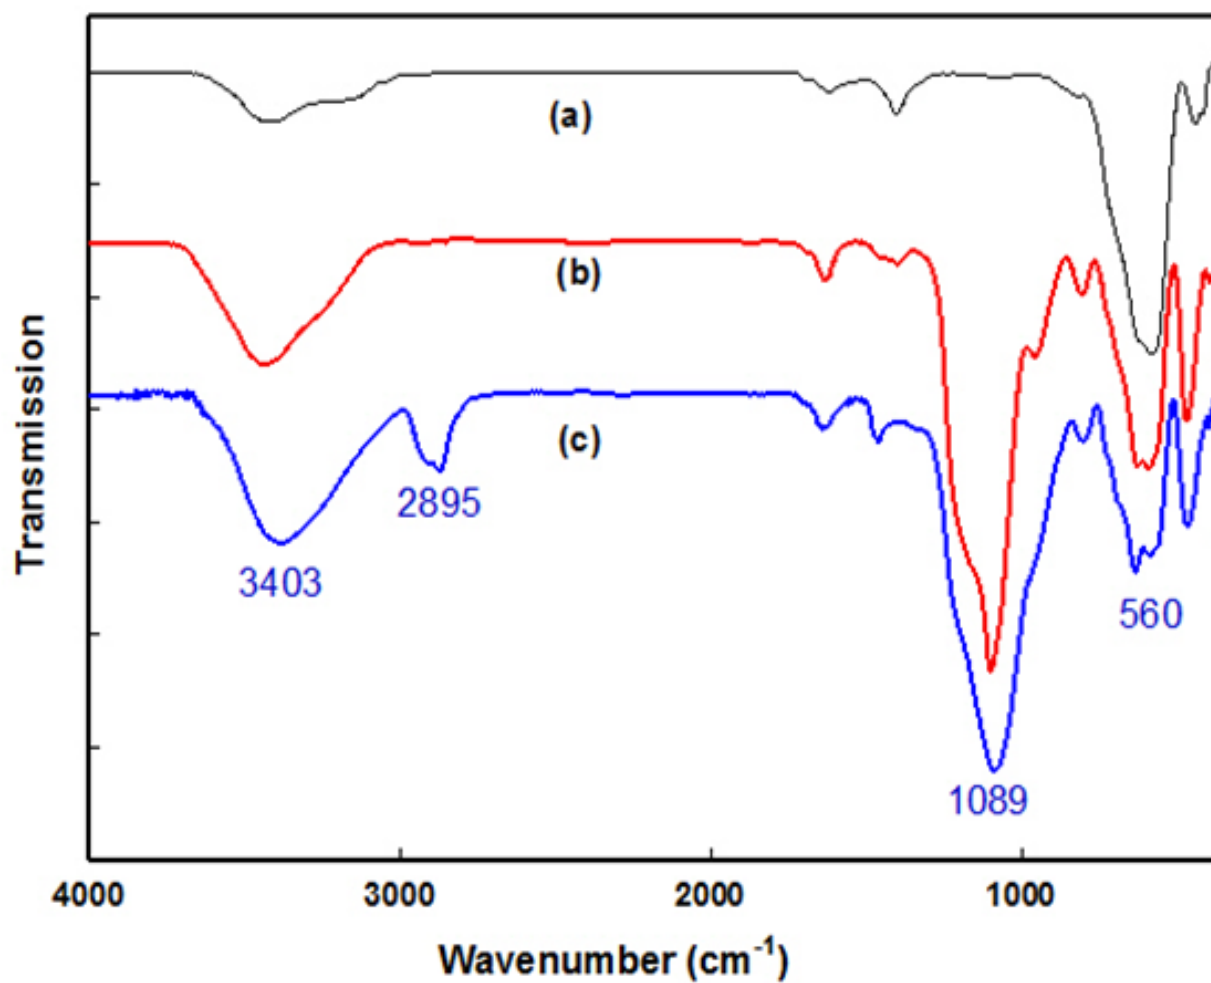

**Figure S1.** The FT-IR spectra of (a)  $\text{Fe}_3\text{O}_4$  NPs, (b) MNP, and (c) MNP/HPG.

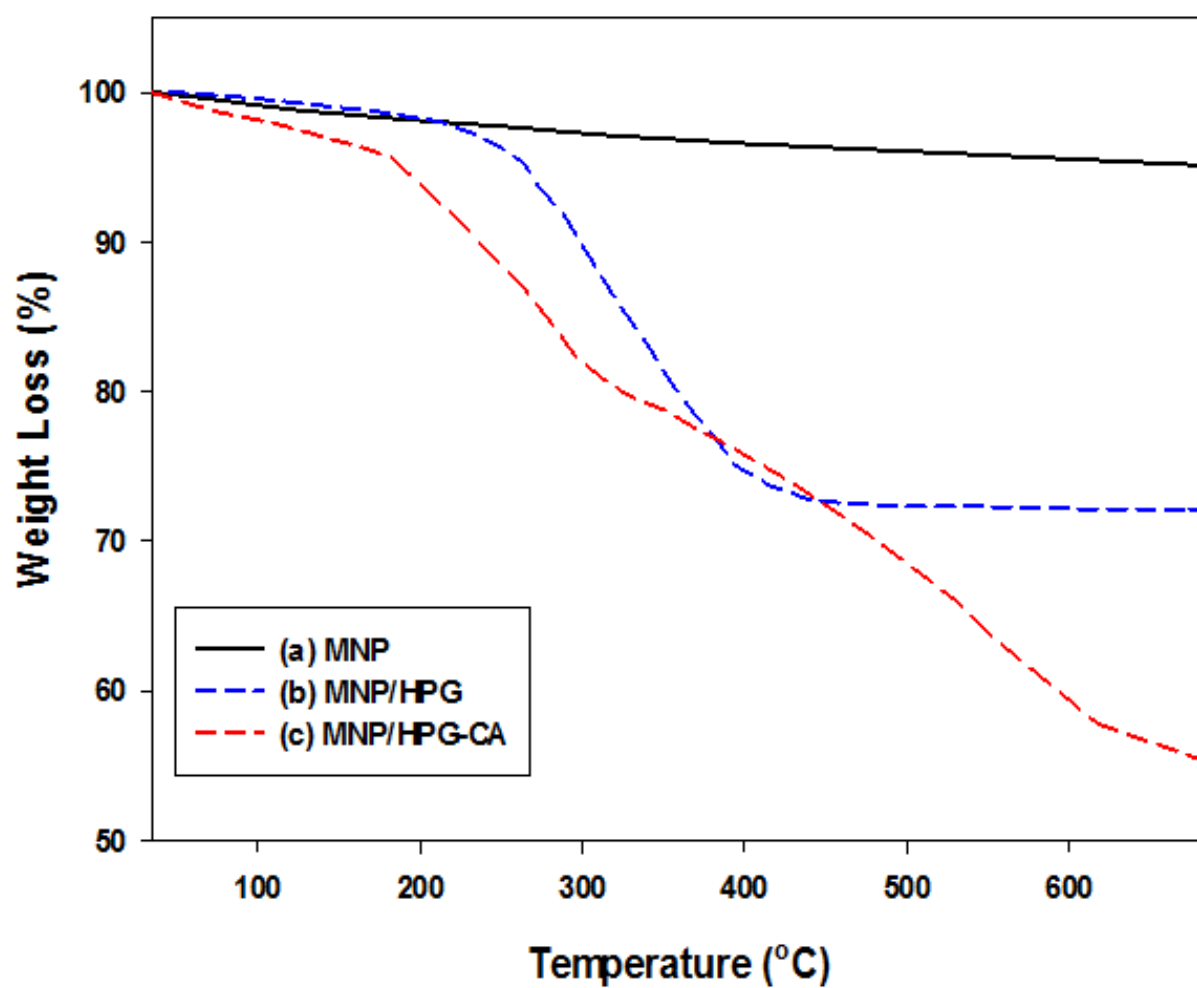

**Figure S2.** The TGA spectra of (a) MNP, (b) MNP/HPG, and (c) MNP/HPG-CA.

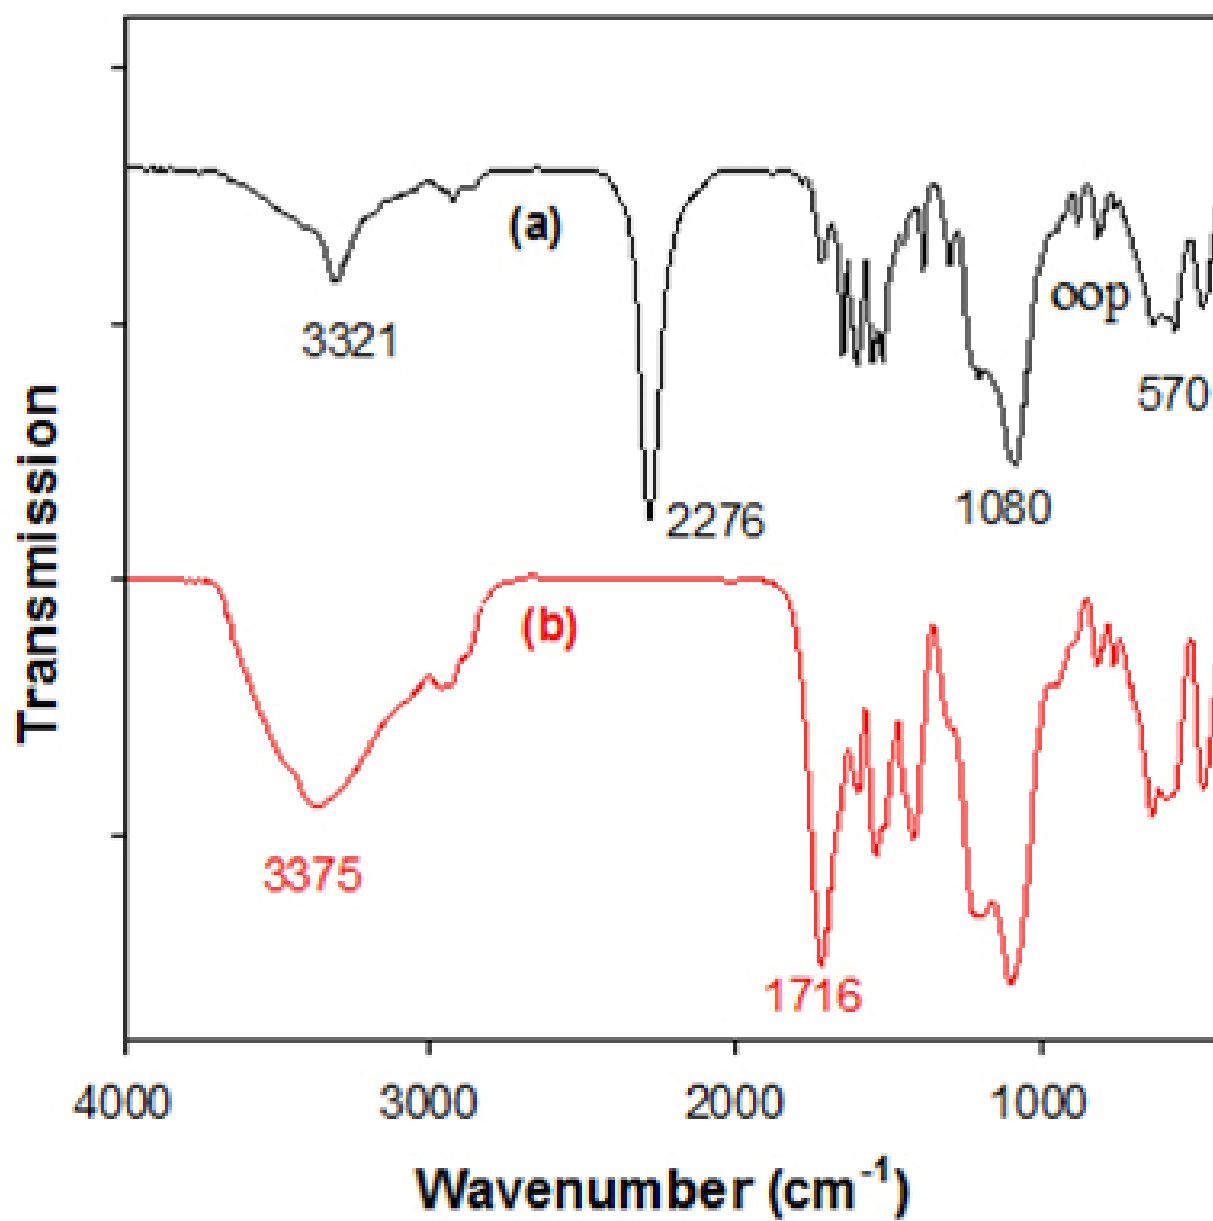

**Figure S3.** The FT-IR spectra of (a) MNP/HPG-TDI and (b) MNP/HPG-CA.

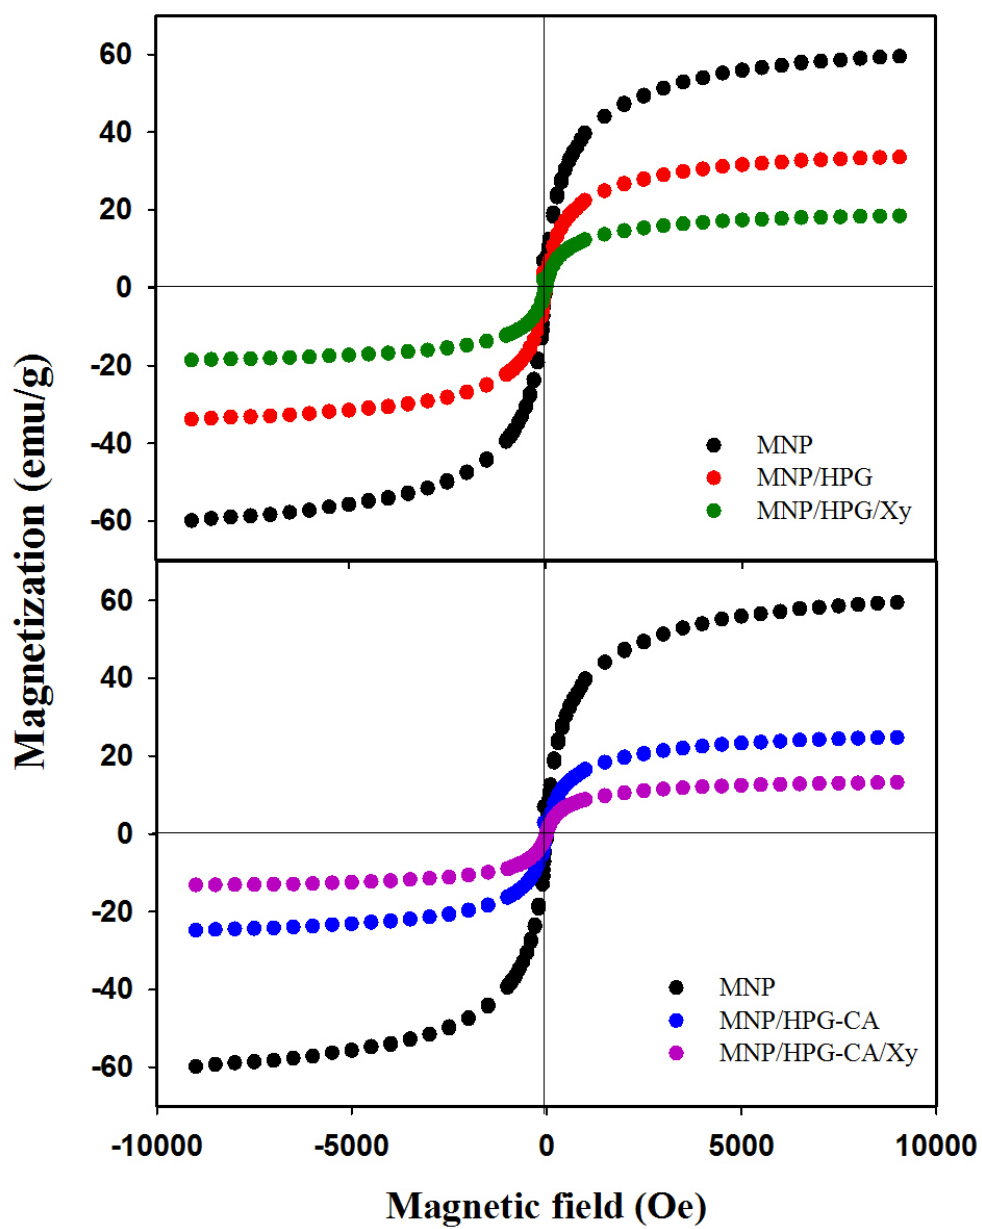

**Figure S4.** The magnetization curves at room temperature for MNP, MNP/HPG, MNP/HPG-CA, MNP/HPG/Xy and MNP/HPG-CA/Xy.
